# Supplementary material
Source: PubMed Central journal article supplement (PMC6220148)
Supplement: ajcr0008-2030-f7.pdf [file ajcr0008-2030-f7.pdf]

## BRMS1 interacts with LSD1/CoREST complex

**Table S1.** Primers, shRNA and siRNA sequences used in this study

| qChIP primers used in this study |        |                           |
|----------------------------------|--------|---------------------------|
| Gene                             | Strand | Sequence                  |
| Vimentin                         | F      | CCGAATCTGAACACTCC         |
| Vimentin                         | R      | CACGGTGATTTGTCTGG         |
| INSIG2                           | F      | CTTATTGACAGCAGGAACCG      |
| INSIG2                           | R      | CTCCTCCACTCCCACAAC        |
| KLK11                            | F      | GACGTGGCTTTGTTCTAATA      |
| KLK11                            | R      | TCCTCCAGTTTCCCTTCA        |
| MRPL33                           | F      | GGGTCTAATGCAGGTGGTT       |
| MRPL33                           | R      | TCGTTCCCTCGGTTTCTCA       |
| COL5A2                           | F      | CTGTTATTAAGCCCCATCTATG    |
| COL5A2                           | R      | ATGCTGCCTCCACTTCTT        |
| OLFML3                           | F      | TCCTGCTTCCCTCCCTTCA       |
| OLFML3                           | R      | GCAAACGCCATTCTGT          |
| SLC1A1                           | F      | GGGCGGGACTCAGGGTTC        |
| SLC1A1                           | R      | GGCCAACCAGCGAGGAAG        |
| GAPDH                            | F      | TACTAGCGGTTTACGGGCG       |
| GAPDH                            | R      | TCGAACAGGAGGAGCAGAGAGCGA  |
| Real-time quantitative primers   |        |                           |
| Gene                             | Strand | Sequence                  |
| BRMS1                            | F      | GCTAAAGGAGAAGTTGTTTCAG    |
| BRMS1                            | R      | GCTCACATTCGACTTATTCC      |
| LSD1                             | F      | GAATTTGCTAATGCCACACC      |
| LSD1                             | R      | GTATTCACAGCTATCACTTCA     |
| INSIG2                           | F      | CAGACATCTAGGAGAACCAC      |
| INSIG2                           | R      | CGAAATCCACTTTAGCACTG      |
| KLK11                            | F      | GCCAAACATCACCATCATTGAG    |
| KLK11                            | R      | TTTGCACTTTTCGTGTAGAC      |
| MRPL33                           | F      | GATCCAGTTGTGAAACAAAGAG    |
| MRPL33                           | R      | AGTGATTCCATGCCATTTCC      |
| COL5A2                           | F      | GTATTCAGCAAACCCATCCA      |
| COL5A2                           | R      | CATAAGCGAACTGAGACCCT      |
| OLFML3                           | F      | ACTGTACGTTTCTTCTACTC      |
| OLFML3                           | R      | GGATCTCAACCTCTAAAGCA      |
| SLC1A1                           | F      | TCATCACCATCAGTATCACGG     |
| SLC1A1                           | R      | TGAAACATCCATCTGCTCCA      |
| Vimentin                         | F      | ATTGAGATTGCCACCTACAG      |
| Vimentin                         | R      | ATCCAGATTAGTTTCCCTCAG     |
| Fibronectin                      | F      | TCAGGCGTCTGTAGAGGCTT      |
| Fibronectin                      | R      | ATGCACATCCTTCGATAAGACTG   |
| E-cadherin                       | F      | GAAATCACATCCTACTGCCC      |
| E-cadherin                       | R      | GTAGCAACTGGAGAACCATTGTC   |
| $\alpha$ -catenin                | F      | ATGATCCCTGCTTCTGTG        |
| $\alpha$ -catenin                | R      | GATACCATCTTCCACAACCTTTCAG |
| GAPAH                            | F      | TCCTCCTGTTTCATCCAAGC      |
| GAPDH                            | R      | TAGTAGCCGGGCCCTACTTT      |
| shRNA and siRNA sequences        |        |                           |
| shSCR                            |        | TTCTCCGAACGTGTCACGT       |
| shBRMS1 #1                       |        | GAGCTCCGAGATGGATGATGA     |
| shBRMS1 #2                       |        | GCCCATACATCGGTACATGC      |
| shLSD1 #1                        |        | GAGACAGACAATACTTGA        |
| shLSD1 #2                        |        | CAATTAGAAGCACCTTATA       |
| VIM siRNA                        |        | GAAAGTGTGGCTGCCAAGA       |

## BRMS1 interacts with LSD1/CoREST complex

**Table S2.** Detailed results of the mass spectrometry analysis

| Accession | Description                                                                                          | Score  | Coverage | # Proteins | # Unique Peptides | # Peptides | # PSMs | # AAs | MW [kDa] | calc. pI |
|-----------|------------------------------------------------------------------------------------------------------|--------|----------|------------|-------------------|------------|--------|-------|----------|----------|
| E9PJF5    | Breast cancer metastasis-suppressor 1 (Fragment) OS=Homo sapiens GN=BRMS1 PE=4 SV=1 - [E9PJF5_HUMAN] | 550.27 | 39.75    | 5          | 17                | 17         | 228    | 244   | 28.3     | 4.74     |
| P08107    | Heat shock 70 kDa protein 1A/1B OS=Homo sapiens GN=HSPA1A PE=1 SV=5 - [HSP71_HUMAN]                  | 524.74 | 45.09    | 5          | 20                | 31         | 209    | 641   | 70.0     | 5.66     |
| P60709    | Actin, cytoplasmic 1 OS=Homo sapiens GN=ACTB PE=1 SV=1 - [ACTB_HUMAN]                                | 155.77 | 39.47    | 30         | 13                | 13         | 70     | 375   | 41.7     | 5.48     |
| Q13547    | Histone deacetylase 1 OS=Homo sapiens GN=HDAC1 PE=1 SV=1 - [HDAC1_HUMAN]                             | 129.77 | 36.72    | 8          | 10                | 16         | 69     | 482   | 55.1     | 5.48     |
| B3KRS5    | Histone deacetylase OS=Homo sapiens GN=HDAC2 PE=1 SV=1 - [B3KRS5_HUMAN]                              | 106.95 | 26.86    | 17         | 5                 | 11         | 58     | 458   | 52.0     | 5.74     |
| Q16531    | DNA damage-binding protein 1 OS=Homo sapiens GN=DDB1 PE=1 SV=1 - [DDB1_HUMAN]                        | 89.34  | 22.02    | 17         | 20                | 20         | 37     | 1140  | 126.9    | 5.26     |
| Q71U36-2  | Isoform 2 of Tubulin alpha-1A chain OS=Homo sapiens GN=TUBA1A - [TBA1A_HUMAN]                        | 80.71  | 33.17    | 32         | 12                | 12         | 37     | 416   | 46.3     | 5.08     |
| O60341    | Lysine-specific histone demethylase 1A OS=Homo sapiens GN=KDM1A PE=1 SV=2 - [KDM1A_HUMAN]            | 29.71  | 11.15    | 5          | 8                 | 8          | 11     | 852   | 92.8     | 6.52     |
| Q9UKL0    | REST corepressor 1 OS=Homo sapiens GN=RCOR1 PE=1 SV=1 - [RCOR1_HUMAN]                                | 18.67  | 12.24    | 11         | 6                 | 6          | 10     | 482   | 53.0     | 7.03     |
| Q96ST3    | Paired amphipathic helix protein Sin3a OS=Homo sapiens GN=SIN3A PE=1 SV=2 - [SIN3A_HUMAN]            | 6.40   | 2.04     | 1          | 3                 | 3          | 3      | 1273  | 145.1    | 7.25     |
